# Supplementary material
Source: PubMed Central journal article supplement (PMC7440927)
Supplement: NIHMS1617856-supplement-Supplemental_Material.pdf [file NIHMS1617856-supplement-Supplemental_Material.pdf]

## Supplemental Material

**Supplemental Table 1: Sample characteristics.**

| <b>Timing of the progesterone add-back phase</b>                                                | <b>Immediately following the gonadal suppression phase (N=27)</b> | <b>Together with estradiol (N=3)</b> | <b>After 5 weeks of estradiol, 0.1 mg per day, followed by 2 week washout (N=10)</b> |
|-------------------------------------------------------------------------------------------------|-------------------------------------------------------------------|--------------------------------------|--------------------------------------------------------------------------------------|
| <b>Progesterone after gonadal suppression (ng/mL), median (range)</b>                           | 0.4 (0.1-1)                                                       | 0.4 (0.2-0.6)                        | 0.4 (0.1-1.4)                                                                        |
| <b>Progesterone after progesterone add-back (ng/mL), median (range)</b>                         | 11.75 (0.4-47.7)                                                  | 10.7 (7.3-20.8)                      | 11 (2-30)                                                                            |
| <b>Scores at the rating scale for premenstrual tension syndrome after gonadal suppression</b>   | 2 (0-11)                                                          | 3(0-3)                               | 2(0-16)                                                                              |
| <b>Scores at the rating scale for premenstrual tension syndrome after progesterone add-back</b> | 3.5 (0-26)                                                        | 13 (12-19)                           | 4.5 (0-30)                                                                           |

**Supplemental Table 2. Summary of the literature on effects of sex steroids on amino acid metabolism.** Abbreviations and symbols: OC: oral contraceptives; ↔ no significant changes; ↑increased concentration; ↓decreased concentration; reference category underscored; \* q<0.1.

| GROUPS                                                            | <u>FOLLICULAR V LUTEAL</u>                                |                                                                                 |                            | <u>OC-FREE v OC</u>                              |
|-------------------------------------------------------------------|-----------------------------------------------------------|---------------------------------------------------------------------------------|----------------------------|--------------------------------------------------|
|                                                                   | <u>GONADAL SUPPRESSION v PROGESTERONE</u> (current study) | OC-FREE                                                                         | OC                         |                                                  |
| Alanine                                                           | ↓ (controls)                                              | ↓(Moller, Moller, Olesen, & Fjalland, 1996; Nagata et al., 2014; Soupart, 1960) | ↓(Moller et al., 1996)     | ↔(Moller et al., 1996; Ruoppolo et al., 2014)    |
| Isoleucine                                                        | ↔                                                         | ↔(Moller et al., 1996; Nagata et al., 2014)                                     | ↔(Moller et al., 1996)     | ↔(Moller et al., 1996), ↑(Ruoppolo et al., 2014) |
| Leucine                                                           | ↔                                                         | ↔(Moller et al., 1996), ↓pre-ovulation(Nagata et al., 2014)                     | ↔(Moller et al., 1996)     | ↔ <sup>19</sup>                                  |
| Valine                                                            | ↔                                                         | ↔(Moller et al., 1996; Nagata et al., 2014)                                     | ↔(Moller et al., 1996)     | ↔(Moller et al., 1996; Ruoppolo et al., 2014)    |
| <b>Amino Acids with Hydrophobic Side Chain – Aromatic</b>         |                                                           |                                                                                 |                            |                                                  |
| Phenylalanine                                                     | ↔                                                         | ↔(Nagata et al., 2014), ↓(Moller et al., 1996)                                  | ↓(Moller et al., 1996)     | ↔(Moller et al., 1996; Ruoppolo et al., 2014)    |
| Tryptophane                                                       | ↔                                                         | ↔(Moller et al., 1996; Nagata et al., 2014)                                     | ↔(Moller et al., 1996)     | ↔(Moller et al., 1996; Ruoppolo et al., 2014)    |
| Tyrosine                                                          | ↓(controls)*                                              | ↓(Moller et al., 1996; Nagata et al., 2014)                                     | ↓(Moller et al., 1996)     | ↓(Moller et al., 1996; Ruoppolo et al., 2014)    |
| <b>Amino Acids with Polar Neutral Side Chains</b>                 |                                                           |                                                                                 |                            |                                                  |
| Asparagine                                                        |                                                           | ↓(Moller et al., 1996; Nagata et al., 2014)                                     | ↓(Moller et al., 1996)     | ↔(Moller et al., 1996; Ruoppolo et al., 2014)    |
| Cysteine                                                          |                                                           |                                                                                 |                            | ↔(Ruoppolo et al., 2014)                         |
| Glutamine                                                         | ↓                                                         | ↓(Nagata et al., 2014)                                                          |                            | ↔(Ruoppolo et al., 2014)                         |
| Methionine                                                        | ↓ (controls)*                                             | ↓(Moller et al., 1996; Nagata et al., 2014)                                     | ↓(Moller et al., 1996)     | ↔(Moller et al., 1996; Ruoppolo et al., 2014)    |
| Serine                                                            | ↔                                                         | ↓(Craft & Wise, 1969; Moller et al., 1996; Nagata et al., 2014; Soupart, 1960)  | ↓(Moller et al., 1996)     | ↔ <sup>19</sup>                                  |
| Threonine                                                         | ↓*                                                        | ↓(Moller et al., 1996; Nagata et al., 2014; Soupart, 1960)                      | ↔(Moller et al., 1996)     | ↑(Moller et al., 1996)                           |
| <b>Amino Acids with Electrically Charged Side Chains – Acidic</b> |                                                           |                                                                                 |                            |                                                  |
| Aspartic acid                                                     | ↓                                                         |                                                                                 |                            | ↔(Ruoppolo et al., 2014)                         |
| Glutamic acid                                                     | ↔                                                         | ↓(Zlotnik et al., 2011)                                                         |                            | ↔(Ruoppolo et al., 2014)                         |
| <b>Amino Acids with Electrically Charged Side Chains – Basic</b>  |                                                           |                                                                                 |                            |                                                  |
| Arginine                                                          | ↓*                                                        | ↓(Moller et al., 1996)                                                          |                            | ↔(Ruoppolo et al., 2014)                         |
| Histidine                                                         | ↓ (controls)                                              |                                                                                 |                            | ↑(Ruoppolo et al., 2014)                         |
| Lysine                                                            | ↓*                                                        | ↓(Moller et al., 1996)                                                          |                            | ↓(Ruoppolo et al., 2014)                         |
| Glycine                                                           |                                                           | ↓(Moller et al., 1996; Nagata et al., 2014)                                     | ↓ Mid(Moller et al., 1996) | ↓(Moller et al., 1996; Ruoppolo et al., 2014)    |
| Proline                                                           | ↓                                                         | ↓(Moller et al., 1996)                                                          |                            | ↓(Ruoppolo et al., 2014)                         |

## Supplemental bibliography

- Craft, I. L., & Wise, I. J. (1969). Changes in amino acid metabolism during the menstrual cycle. *The Journal of Obstetrics and Gynaecology of the British Commonwealth*, 76(10), 928–933.
- Moller, S. E., Moller, B. M., Olesen, M., & Fjalland, B. (1996). Effects of oral contraceptives on plasma neutral amino acids and cholesterol during a menstrual cycle. *European Journal of Clinical Pharmacology*, 50(3), 179–184.
- Nagata, C., Wada, K., Tsuji, M., Hayashi, M., Takeda, N., & Yasuda, K. (2014). Plasma amino acid profiles are associated with biomarkers of breast cancer risk in premenopausal Japanese women. *Cancer Causes & Control: CCC*, 25(2), 143–149. <https://doi.org/10.1007/s10552-013-0316-8>
- Ruoppolo, M., Campesi, I., Scolamiero, E., Pecce, R., Caterino, M., Cherchi, S., ... Franconi, F. (2014). Serum metabolomic profiles suggest influence of sex and oral contraceptive use. *American Journal of Translational Research*, 6(5), 614–624.
- Soupart, P. (1960). [Aminoacidemia and aminoaciduria during the menstrual cycle in the normal woman]. *Clinica Chimica Acta; International Journal of Clinical Chemistry*, 5, 235–249.
- Steiner, M., Haskett, R. F., & Carroll, B. J. (1980). Premenstrual tension syndrome: the development of research diagnostic criteria and new rating scales. *Acta Psychiatrica Scandinavica*, 62(2), 177–190.
- Zlotnik, A., Gruenbaum, B. F., Mohar, B., Kuts, R., Gruenbaum, S. E., Ohayon, S., ... Teichberg, V. I. (2011). The effects of estrogen and progesterone on blood glutamate levels: evidence from changes of blood glutamate levels during the menstrual cycle in women. *Biology of Reproduction*, 84(3), 581–586. <https://doi.org/10.1095/biolreprod.110.088120>
